# Supplementary material for: Pax6 limits the competence of developing cerebral cortical cells to respond to inductive intercellular signals
Source: PLoS Biol. 2022 Sep 6;20(9):e3001563. doi: 10.1371/journal.pbio.3001563 (PMC9481180; doi:10.1371/journal.pbio.3001563)
Supplement: S6 Data — (XLSX) [file pbio.3001563.s029.xlsx]

## Sheet: A) Fig 6D Gad1+GFP- cells
	Pax6 cKO
	Number of immigrant interneurons (Gad1+; GFP-) per section
Intact side	223
	149
	151
Cut side	59
	43
	49

## Sheet: B) Fig 6F GFP+Gsx2+ cells
Intact or cut side	ROI	Pax6 cKO
		Number of Gsx2+ GFP+ cells	Total Number of Cells	Proportion of Gsx2+ GFP+ cells
Cut	I	38	684	0.0555556
		68	639	0.106416
		58	922	0.0629067
Intact	I	96	690	0.13913
		140	603	0.232172
		72	463	0.155508
Cut	II	28	788	0.035533
		61	543	0.112339
		50	748	0.0668449
Intact	II	112	857	0.130688
		119	517	0.230174
		72	437	0.16476
Cut	III	77	872	0.0883028
		37	427	0.0866511
		45	486	0.0925926
Intact	III	102	756	0.134921
		98	556	0.176259
		78	703	0.110953
